# Supplementary material for: The development of academic family medicine in central and eastern Europe since 1990
Source: PubMed Central journal article supplement (PMC3608318; doi:10.1186/1471-2296-14-37), 2013-03-19
Supplement: 1471-2296-14-37-S1.pdf [file 1471-2296-14-37-S1.pdf]

## The Family Medicine in Middle and Eastern Europe (FATMEE) Study instrument.

| No.                                       | Indicator                                                                                                                                   |                                                                                                                                                      | Comments |
|-------------------------------------------|---------------------------------------------------------------------------------------------------------------------------------------------|------------------------------------------------------------------------------------------------------------------------------------------------------|----------|
| <b>Area I. Role in Health Care System</b> |                                                                                                                                             |                                                                                                                                                      |          |
| 1.1                                       | Is there an official policy document presenting current role of family medicine in your country? If yes, what kind of document is it?       | [parliamentary law/ministerial decree/ scientific paper/other]                                                                                       |          |
| 1.2                                       | Is there an official policy document presenting future development of family medicine in your country? If yes, what kind of document is it? | [parliamentary law/ministerial decree/ scientific paper/other]                                                                                       |          |
| 1.3                                       | Are the competences of family physicians clearly described? If so, on which level?                                                          | [Government/insurance company/college/local authorities/other]                                                                                       |          |
| 1.4                                       | Who is responsible for organization of family medicine/general practice services?                                                           | [government/local authorities/insurance companies/other - name]                                                                                      |          |
| 1.5                                       | Is specialty in family medicine/general practice formally recognized?                                                                       | [Yes/No]                                                                                                                                             |          |
| 1.6                                       | If so, has it the same formal status as other specialties (e.g. neurology or cardiology)                                                    | [Yes/No]                                                                                                                                             |          |
| 1.7                                       | Do formal requirements exist for physicians (such as GPs/Family doctors) to work in PC?                                                     | [Yes/No]                                                                                                                                             |          |
| 1.8                                       | What kind of physicians can provide PC services?                                                                                            | [family physicians/ internists/ pediatricians/ gynecologists/ other specialists/ physicians without any specialization]                              |          |
| 1.9                                       | What percent of all PC physicians have specialization in family medicine?                                                                   |                                                                                                                                                      |          |
| 1.10                                      | What is the formal status of family physicians                                                                                              | [only state employee/mostly state employee/both state employee and independent contractor/mostly independent contractor/only independent contractor] |          |

|                             |                                                                                            |                                                                                                         |                                                                                                                                                                                                                                                                                                                                                                                                                                                                                            |                             |  |               |  |           |  |                 |  |                |  |            |  |               |  |         |  |         |  |              |  |              |  |  |
|-----------------------------|--------------------------------------------------------------------------------------------|---------------------------------------------------------------------------------------------------------|--------------------------------------------------------------------------------------------------------------------------------------------------------------------------------------------------------------------------------------------------------------------------------------------------------------------------------------------------------------------------------------------------------------------------------------------------------------------------------------------|-----------------------------|--|---------------|--|-----------|--|-----------------|--|----------------|--|------------|--|---------------|--|---------|--|---------|--|--------------|--|--------------|--|--|
| 1.11                        | Total expenditure on PC as % of total expenditure on health                                |                                                                                                         |                                                                                                                                                                                                                                                                                                                                                                                                                                                                                            |                             |  |               |  |           |  |                 |  |                |  |            |  |               |  |         |  |         |  |              |  |              |  |  |
| 1.12                        | Number of GP consultations per capita per year                                             |                                                                                                         |                                                                                                                                                                                                                                                                                                                                                                                                                                                                                            |                             |  |               |  |           |  |                 |  |                |  |            |  |               |  |         |  |         |  |              |  |              |  |  |
| 1.13                        | 1.13.1                                                                                     | Do PC physicians have their personal patient lists?                                                     | [yes/no]                                                                                                                                                                                                                                                                                                                                                                                                                                                                                   |                             |  |               |  |           |  |                 |  |                |  |            |  |               |  |         |  |         |  |              |  |              |  |  |
|                             | 1.13.2                                                                                     | If [yes], what is an average list size?                                                                 | [ <i>n</i> ]                                                                                                                                                                                                                                                                                                                                                                                                                                                                               |                             |  |               |  |           |  |                 |  |                |  |            |  |               |  |         |  |         |  |              |  |              |  |  |
|                             | 1.13.3                                                                                     | Is there a minimum and maximum limit?                                                                   | [yes: ( <i>n</i> <sub>min</sub> ); ( <i>n</i> <sub>max</sub> )/ no]                                                                                                                                                                                                                                                                                                                                                                                                                        |                             |  |               |  |           |  |                 |  |                |  |            |  |               |  |         |  |         |  |              |  |              |  |  |
|                             | 1.13.4                                                                                     | Are there any measures (e.g. in payment) employed to influence the maximum or minimum size of the list? | [yes/no]                                                                                                                                                                                                                                                                                                                                                                                                                                                                                   |                             |  |               |  |           |  |                 |  |                |  |            |  |               |  |         |  |         |  |              |  |              |  |  |
|                             | 1.13.5                                                                                     | If [yes] describe briefly                                                                               |                                                                                                                                                                                                                                                                                                                                                                                                                                                                                            |                             |  |               |  |           |  |                 |  |                |  |            |  |               |  |         |  |         |  |              |  |              |  |  |
| 1.14                        | 1.14.1                                                                                     | How PC services are paid?                                                                               | [fixed budget/pure capitation/capitation with wages/fee for service/mixed system]                                                                                                                                                                                                                                                                                                                                                                                                          |                             |  |               |  |           |  |                 |  |                |  |            |  |               |  |         |  |         |  |              |  |              |  |  |
|                             | 1.14.2                                                                                     | If mixed system, what are the components?                                                               |                                                                                                                                                                                                                                                                                                                                                                                                                                                                                            |                             |  |               |  |           |  |                 |  |                |  |            |  |               |  |         |  |         |  |              |  |              |  |  |
| 1.15                        | 1.15.1                                                                                     | How family physicians are paid?                                                                         | [salary/ income from the contract/ by patients out of pocket/ mixed system]                                                                                                                                                                                                                                                                                                                                                                                                                |                             |  |               |  |           |  |                 |  |                |  |            |  |               |  |         |  |         |  |              |  |              |  |  |
|                             | 1.15.2                                                                                     | If mixed system, what are the components?                                                               | [ <i>please describe briefly</i> ]                                                                                                                                                                                                                                                                                                                                                                                                                                                         |                             |  |               |  |           |  |                 |  |                |  |            |  |               |  |         |  |         |  |              |  |              |  |  |
| 1.16                        | Are family physicians gate-keepers to specialist services?                                 |                                                                                                         | [total/partial/ not at all]                                                                                                                                                                                                                                                                                                                                                                                                                                                                |                             |  |               |  |           |  |                 |  |                |  |            |  |               |  |         |  |         |  |              |  |              |  |  |
| 1.17                        | Which of the following specialties are accessible without referral from family physicians? |                                                                                                         | <table border="1"> <tr><td>Gynaecologist /obstetrician</td><td></td></tr> <tr><td>Paediatrician</td><td></td></tr> <tr><td>Internist</td><td></td></tr> <tr><td>Ophthalmologist</td><td></td></tr> <tr><td>ENT specialist</td><td></td></tr> <tr><td>Oncologist</td><td></td></tr> <tr><td>Dermatologist</td><td></td></tr> <tr><td>Surgeon</td><td></td></tr> <tr><td>Dentist</td><td></td></tr> <tr><td>Psychiatrist</td><td></td></tr> <tr><td>Other (name)</td><td></td></tr> </table> | Gynaecologist /obstetrician |  | Paediatrician |  | Internist |  | Ophthalmologist |  | ENT specialist |  | Oncologist |  | Dermatologist |  | Surgeon |  | Dentist |  | Psychiatrist |  | Other (name) |  |  |
| Gynaecologist /obstetrician |                                                                                            |                                                                                                         |                                                                                                                                                                                                                                                                                                                                                                                                                                                                                            |                             |  |               |  |           |  |                 |  |                |  |            |  |               |  |         |  |         |  |              |  |              |  |  |
| Paediatrician               |                                                                                            |                                                                                                         |                                                                                                                                                                                                                                                                                                                                                                                                                                                                                            |                             |  |               |  |           |  |                 |  |                |  |            |  |               |  |         |  |         |  |              |  |              |  |  |
| Internist                   |                                                                                            |                                                                                                         |                                                                                                                                                                                                                                                                                                                                                                                                                                                                                            |                             |  |               |  |           |  |                 |  |                |  |            |  |               |  |         |  |         |  |              |  |              |  |  |
| Ophthalmologist             |                                                                                            |                                                                                                         |                                                                                                                                                                                                                                                                                                                                                                                                                                                                                            |                             |  |               |  |           |  |                 |  |                |  |            |  |               |  |         |  |         |  |              |  |              |  |  |
| ENT specialist              |                                                                                            |                                                                                                         |                                                                                                                                                                                                                                                                                                                                                                                                                                                                                            |                             |  |               |  |           |  |                 |  |                |  |            |  |               |  |         |  |         |  |              |  |              |  |  |
| Oncologist                  |                                                                                            |                                                                                                         |                                                                                                                                                                                                                                                                                                                                                                                                                                                                                            |                             |  |               |  |           |  |                 |  |                |  |            |  |               |  |         |  |         |  |              |  |              |  |  |
| Dermatologist               |                                                                                            |                                                                                                         |                                                                                                                                                                                                                                                                                                                                                                                                                                                                                            |                             |  |               |  |           |  |                 |  |                |  |            |  |               |  |         |  |         |  |              |  |              |  |  |
| Surgeon                     |                                                                                            |                                                                                                         |                                                                                                                                                                                                                                                                                                                                                                                                                                                                                            |                             |  |               |  |           |  |                 |  |                |  |            |  |               |  |         |  |         |  |              |  |              |  |  |
| Dentist                     |                                                                                            |                                                                                                         |                                                                                                                                                                                                                                                                                                                                                                                                                                                                                            |                             |  |               |  |           |  |                 |  |                |  |            |  |               |  |         |  |         |  |              |  |              |  |  |
| Psychiatrist                |                                                                                            |                                                                                                         |                                                                                                                                                                                                                                                                                                                                                                                                                                                                                            |                             |  |               |  |           |  |                 |  |                |  |            |  |               |  |         |  |         |  |              |  |              |  |  |
| Other (name)                |                                                                                            |                                                                                                         |                                                                                                                                                                                                                                                                                                                                                                                                                                                                                            |                             |  |               |  |           |  |                 |  |                |  |            |  |               |  |         |  |         |  |              |  |              |  |  |

|      |                                                                                               |                                                                                                                                                                                                                                                                      |  |
|------|-----------------------------------------------------------------------------------------------|----------------------------------------------------------------------------------------------------------------------------------------------------------------------------------------------------------------------------------------------------------------------|--|
|      |                                                                                               |                                                                                                                                                                                                                                                                      |  |
| 1.18 | 1.18.1 Is there a number weekly of working hours/doctor's availability in practice regulated? | [yes/no]                                                                                                                                                                                                                                                             |  |
|      | 1.18.2 If [yes], how much is it?                                                              | [n]                                                                                                                                                                                                                                                                  |  |
|      | 1.18.3. If [yes] are doctors obliged to spend number of hours in office, how many?            | [yes/no] 1.18.4 [n]                                                                                                                                                                                                                                                  |  |
| 1.19 | Is out- of- hour care (nights, weekends, holidays & festivals) part of PC contract?           | [obligatory/voluntary/ not at all]                                                                                                                                                                                                                                   |  |
| 1.20 | How is out-of-hour care organized:                                                            | <ol style="list-style-type: none"> <li>1. Rota of duties shared by several practices (physician)</li> <li>2. Deputizing service hired</li> <li>3. Emergency service</li> <li>4. Hospital-based centres</li> <li>5. Other (<i>please describe briefly</i>)</li> </ol> |  |
| 1.21 | What kind of services are normally provided by family practices?                              |                                                                                                                                                                                                                                                                      |  |
|      | 1.21.1 Curative care for children                                                             | [always/ sometimes/ never]                                                                                                                                                                                                                                           |  |
|      | 1.21.2 Curative care for adults                                                               | [always/ sometimes/ never]                                                                                                                                                                                                                                           |  |
|      | 1.21.3 Minor surgery                                                                          | [always/ sometimes/ never]                                                                                                                                                                                                                                           |  |
|      | 1.21.4 Prenatal and pregnancy care                                                            | [always/ sometimes/ never]                                                                                                                                                                                                                                           |  |
|      | 1.21.5 Children surveillance and preventive care                                              | [always/ sometimes/ never]                                                                                                                                                                                                                                           |  |
|      | 1.21.6 Adults screening and preventive programs                                               | [always/ sometimes/ never]                                                                                                                                                                                                                                           |  |
|      | 1.21.7 Assessment/medical certification for social services/social insurance purposes         | [always/ sometimes/ never]                                                                                                                                                                                                                                           |  |
| 1.22 | What are the forms of services provided by family physician:                                  |                                                                                                                                                                                                                                                                      |  |

|             |                                                                          |                                                                                                                                              |  |
|-------------|--------------------------------------------------------------------------|----------------------------------------------------------------------------------------------------------------------------------------------|--|
|             | 1.22.1 Office consultation                                               | [yes/no]                                                                                                                                     |  |
|             | 1.22.2 Home visits                                                       | [yes/no]                                                                                                                                     |  |
|             | 1.22.3 Telephone consultations                                           | [yes/no]                                                                                                                                     |  |
|             | 1.22.4 Group sessions                                                    | [yes/no]                                                                                                                                     |  |
|             | 1.22.5. Assessment for social services                                   | [yes/no]                                                                                                                                     |  |
|             | 1.22.6 Other                                                             | [ <i>please name it</i> ]                                                                                                                    |  |
| <b>1.23</b> | What are the forms of patients records                                   | [EMR only/ both paper and EMR/ paper only]                                                                                                   |  |
| <b>1.24</b> | What is the level of computerization of family practices in the country: |                                                                                                                                              |  |
|             | 1.24.1 For administrative purposes                                       | [nearly all practices computerized/ more than half/ some/ none]                                                                              |  |
|             | 1.24.2 For clinical care (EMR)                                           | [nearly all practices computerized/ more than half/ some/ none]                                                                              |  |
|             | 1.24.3 Other reasons                                                     | [nearly all practices computerized/ more than half/ some/ none]                                                                              |  |
| <b>1.25</b> | Rank the following organizational forms of family practices:             | <ol style="list-style-type: none"> <li>1. [predominant]</li> <li>2. [less frequent]</li> <li>3. [rare]</li> <li>4. [not existing]</li> </ol> |  |
|             | 1.25.1 Single handed (solo)                                              |                                                                                                                                              |  |
|             | 1.25.2 Group practice of 2 or 3 family physicians                        |                                                                                                                                              |  |
|             | 1.25.3 Health centers with many family physicians                        |                                                                                                                                              |  |
|             | 1.25.4 Health centers with family physicians and other specialists       |                                                                                                                                              |  |
| <b>1.26</b> | Total nr. of specialists in family medicine and total number             | [n1][n2]                                                                                                                                     |  |

|                                 |                                                                                                                                                                      |                                                                        |                                                                                                                           |  |
|---------------------------------|----------------------------------------------------------------------------------------------------------------------------------------------------------------------|------------------------------------------------------------------------|---------------------------------------------------------------------------------------------------------------------------|--|
|                                 | of all physicians in the country.                                                                                                                                    |                                                                        |                                                                                                                           |  |
| 1.27                            | Average age of working family doctors in the country                                                                                                                 |                                                                        | [n]                                                                                                                       |  |
| 1.28                            | Is there a shortage of family physicians in the country?                                                                                                             |                                                                        | [severe/moderate/not at all]                                                                                              |  |
| 1.29                            | What is yearly number of qualified GPs/FDs emigrating/immigrating                                                                                                    |                                                                        | [n] (please enter the year) [not available]                                                                               |  |
| 1.30                            | Is WONCA definition of family medicine recognized and implemented by health authorities and policy makers?                                                           |                                                                        | [yes/no]                                                                                                                  |  |
| <b>Area II: Quality of care</b> |                                                                                                                                                                      |                                                                        |                                                                                                                           |  |
| 2.1                             | Please name important voluntary mechanisms in your country to maintain and improve the quality of care (e.g. clinical guidelines, voluntary peer-review mechanisms). |                                                                        | [voluntary quality improvement mechanism]                                                                                 |  |
| 2.2                             | Have evidence-based clinical guidelines been produced for specific use by family physicians?                                                                         |                                                                        | [yes/no]                                                                                                                  |  |
| 2.3                             | Is there any system of registration and reporting medical errors in PHC in function?                                                                                 |                                                                        | [yes/no]                                                                                                                  |  |
| 2.4                             | 2.41                                                                                                                                                                 | Is there an accreditation system of family practices in the country?   | [obligatory/ voluntary/ do not exist]                                                                                     |  |
|                                 | 2.42                                                                                                                                                                 | If one exists, who is responsible for it?                              | [governmental body/ GP association/ other NGO/other (please, name it)]                                                    |  |
| 2.5                             | Which part of family practices is accredited?                                                                                                                        |                                                                        | [nearly all/ majority/ minority/ very few]                                                                                |  |
| 2.6                             | Are there any incentives to undergo accreditation process?                                                                                                           |                                                                        | [financial (e.g. higher fee)/better chance to get the contract/internal motivation only/ other (please describe briefly)] |  |
| 2.7                             | 2.7.1                                                                                                                                                                | Do family practices undergo any other common accreditation (e.g. ISO)? | [nearly all/majority/minority/very few/any]                                                                               |  |
|                                 | 2.7.2                                                                                                                                                                | If they undergo – please name the most popular accreditation systems   | [...]                                                                                                                     |  |
| 2.8                             | 2.8.1                                                                                                                                                                | Do peer-review groups exist in your country?                           | [yes/no]                                                                                                                  |  |
|                                 | 2.8.2                                                                                                                                                                | If [yes], what part of family physicians is involved?                  | [nearly all/ majority/ minority/ very few]                                                                                |  |
| 2.9                             | Are there any incentives to participate in the peer-review process?                                                                                                  |                                                                        | [financial (e.g. higher fee)/better chance to get the contract/internal motivation only/ other (please                    |  |

|                           |                                                                                                                                     |                                                                                                       |                                                                                                                                          |  |
|---------------------------|-------------------------------------------------------------------------------------------------------------------------------------|-------------------------------------------------------------------------------------------------------|------------------------------------------------------------------------------------------------------------------------------------------|--|
|                           |                                                                                                                                     |                                                                                                       | <i>describe briefly</i> ]                                                                                                                |  |
| 2.10                      | Is your country represented in EQUIP?                                                                                               |                                                                                                       | [yes/no]                                                                                                                                 |  |
| <b>Area III: Teaching</b> |                                                                                                                                     |                                                                                                       |                                                                                                                                          |  |
| 3.1                       | How many medical faculties at the university level are there in your country? (some of universities may have more than one faculty) |                                                                                                       | [n]                                                                                                                                      |  |
| 3.2                       | How many medical faculties have departments of family medicine?                                                                     |                                                                                                       | [n]                                                                                                                                      |  |
| 3.3                       | How many departments are chaired by family physicians with professor title?                                                         |                                                                                                       | [n]                                                                                                                                      |  |
| 3.4                       | How many departments are chaired by professors of other disciplines?                                                                |                                                                                                       | [n]                                                                                                                                      |  |
| 3.5                       | % of medical faculties at university level with a postgraduate program in family medicine                                           |                                                                                                       | [n]                                                                                                                                      |  |
| 3.6                       | 3.61                                                                                                                                | Is family medicine subject in the undergraduate medical curriculum?                                   | [yes/no]                                                                                                                                 |  |
|                           | 3.62                                                                                                                                | If [yes], how many universities teaches it?                                                           |                                                                                                                                          |  |
| 3.7                       | 3.71                                                                                                                                | Is there within medical undergraduate curriculum minimum number of teaching hours in family medicine? | [yes/no]                                                                                                                                 |  |
|                           | 3.72                                                                                                                                | If [yes] – how many?                                                                                  |                                                                                                                                          |  |
| 3.8                       | Are there any quality measures or requirements for teaching practices?                                                              |                                                                                                       | [none/ yes, but not applied /yes, applied / accreditation necessary]                                                                     |  |
| 3.9                       | Who organize specialist training in family medicine?                                                                                |                                                                                                       | [special postgraduate centre/ universities/ hospitals/ GP association/ other/ not applicable – there is no specialty in family medicine/ |  |
| 3.10                      | What is the duration of specialist training in family medicine in your country (in months)?                                         |                                                                                                       | [n]                                                                                                                                      |  |
| 3.11                      | What is the duration of specialist training in family medicine in primary care setting (in months)?                                 |                                                                                                       | [n]                                                                                                                                      |  |
| 3.12                      | Are the residents (trainees) in family practice paid?                                                                               |                                                                                                       | [ not paid/paid by trainers/paid by state or local                                                                                       |  |

|                          |                                                                                   |                                                                                                      |                                                                                                                                                                             |  |
|--------------------------|-----------------------------------------------------------------------------------|------------------------------------------------------------------------------------------------------|-----------------------------------------------------------------------------------------------------------------------------------------------------------------------------|--|
|                          |                                                                                   |                                                                                                      | government/paid by insurance/paid by hospital]                                                                                                                              |  |
| 3.13                     | 3.13.1                                                                            | Is there any formal exam at the end of specialist training?                                          | [yes/no]                                                                                                                                                                    |  |
|                          | 3.13.2                                                                            | If [yes]                                                                                             | [MCQ/ written/ oral/ practical/ other (please, describe briefly)]                                                                                                           |  |
| 3.14                     | 3.14.1                                                                            | Are there in your country any courses for family medicine teachers available (e.g. Leonardo EURACT)? | [yes/no]                                                                                                                                                                    |  |
|                          | 3.14.2                                                                            | If [yes], how many family medicine teachers completed them?                                          | [n]                                                                                                                                                                         |  |
| 3.15                     | What are the incentives to undertake specialty training in family medicine?       |                                                                                                      | [better professional perspectives/ higher salary as a trainee/ higher future salary/ easy access to specialization/ other (please describe briefly)/ no special incentives] |  |
| 3.16                     | What is the number of trainees starting (yearly) the postgraduate program in GP ? |                                                                                                      | [n]                                                                                                                                                                         |  |
| 3.17                     | Is there any formal recertification of family physicians in your country?         |                                                                                                      | [voluntary/ obligatory/ not at all]                                                                                                                                         |  |
| 3.18                     | Is your country represented in EURACT?                                            |                                                                                                      | [yes/no]                                                                                                                                                                    |  |
| 3.19                     | Has EURACT Educational Agenda been translated and/or implemented in the country?  |                                                                                                      | [translated and implemented/translated but not implemented/ not translated but implemented/ not translated and not implemented]                                             |  |
| <b>Area IV: Research</b> |                                                                                   |                                                                                                      |                                                                                                                                                                             |  |
| 4.1                      | Are there postgraduate programs (Ph.D.) in GP/FM available and functioning        |                                                                                                      | [ no/ yes, less than 5GPs in program/yes, more than 5GPs in the program]                                                                                                    |  |
| 4.2                      | Do scientific organization of family physicians exist in your country?            |                                                                                                      | [yes/no]                                                                                                                                                                    |  |
| 4.3                      | Is this organization full member of WONCA?                                        |                                                                                                      | [yes/no]                                                                                                                                                                    |  |
| 4.4                      | Is your country represented in EGPRN?                                             |                                                                                                      | [yes/no]                                                                                                                                                                    |  |
| 4.5                      | 4.5.1                                                                             | Is there a scientific peer-reviewed journal on family medicine published in this country?            | [yes/no]                                                                                                                                                                    |  |

|      |        |                                                                                   |                                                                                          |  |
|------|--------|-----------------------------------------------------------------------------------|------------------------------------------------------------------------------------------|--|
|      | 4.5.2  | If [yes], how many issues a year are published?                                   | [n]                                                                                      |  |
| 4.6  | 4.6.1  | Are there scientific conferences on national level regularly being organized?     | [yes/no]                                                                                 |  |
|      | 4.6.2  | If [yes], how often?                                                              | [twice a year or more often/annually/biannually/other <i>(please describe briefly)</i> ] |  |
| 4.7  |        | How many GPs do usually attend WONCA Europe conference                            | [less than 5/ 5-15/15-30/more than 30]                                                   |  |
| 4.8  |        | How many abstracts are presented at WONCA conferences                             | [n]                                                                                      |  |
| 4.9  |        | Are there special funds to carry on research in family medicine available?        | [yes/no]                                                                                 |  |
| 4.10 | 4.10.1 | Is there in the country a research network of family physicians/family practices? | [yes/no]                                                                                 |  |
|      | 4.10.1 | If [yes] how many doctors/practices are involved?                                 | [n]                                                                                      |  |
